# Supplementary material for: Synchronous delivery of oxygen and photosensitizer for alleviation of hypoxia tumor microenvironment and dramatically enhanced photodynamic therapy
Source: PubMed Central journal article supplement (PMC6058564; doi:10.1080/10717544.2018.1435751), 2018-02-20
Supplement: IDRD_A_1435751_SM3342.pdf [file IDRD_A_1435751_SM3342.pdf]

## Supplementary data

# Synchronous delivery of oxygen and photosensitizer for alleviation of hypoxia tumor microenvironment and dramatically enhanced photodynamic therapy

Xiaomeng Guo<sup>1,#</sup>, Jiaxin Qu<sup>1,2,#</sup>, Chunqi Zhu<sup>1</sup>, Wei Li<sup>1</sup>, Lihua Luo<sup>1</sup>, Jie Yang<sup>1</sup>,  
Xiaoyi Yin<sup>2</sup>, Qingpo Li<sup>1</sup>, Yongzhong Du<sup>1</sup>, Dawei Chen<sup>2</sup>, Jian You<sup>1\*</sup>

### Authors' Affiliations:

<sup>1</sup>College of Pharmaceutical Sciences, Zhejiang University, 866 Yuhangtang Road, Hangzhou, Zhejiang 310058, P. R. China

<sup>2</sup>Department of Pharmaceutics, School of Pharmaceutical Science, Shenyang Pharmaceutical University, 103 Wenhua Road, Shenyang 110016, P. R. China

#These authors contributed equally to this work.

### \* Corresponding Author:

Jian You, College of Pharmaceutical Sciences, Zhejiang University, 866 Yuhangtang Road, Hangzhou 310058, Zhejiang, China. Office: 086-571-88981651 Fax: 086-571-88208439 Email: youjiandoc@zju.edu.cn.

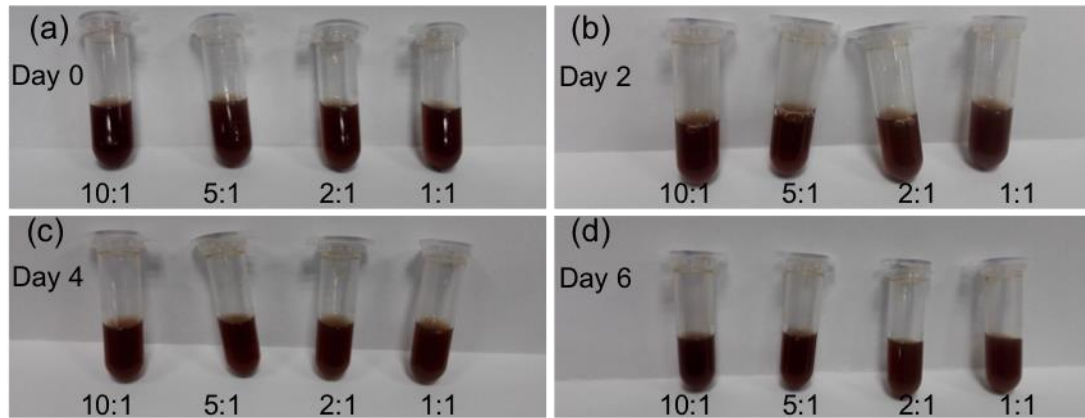

Figure S1. The stability of LIH liposomes prepared with different ratios of phosphatide at day 0, 2, 4 and 6.

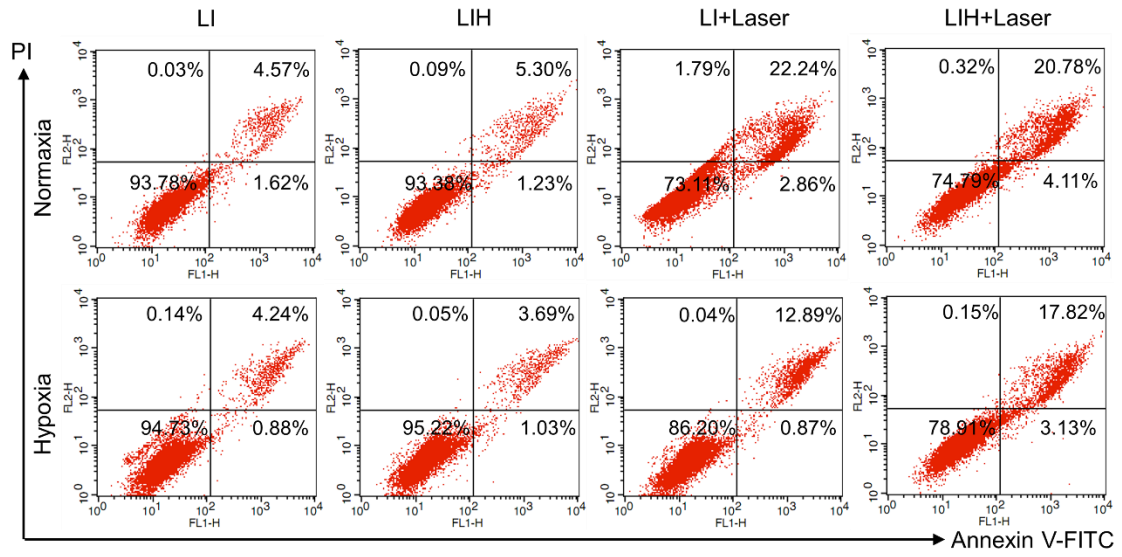

Figure S2. Apoptotic results of LI and LIH against CT-26 cells in normoxia and hypoxia environment without or with laser irradiation (808 nm, 1 W/cm<sup>2</sup>, 1 min), the concentration of ICG was 5 ug/mL.

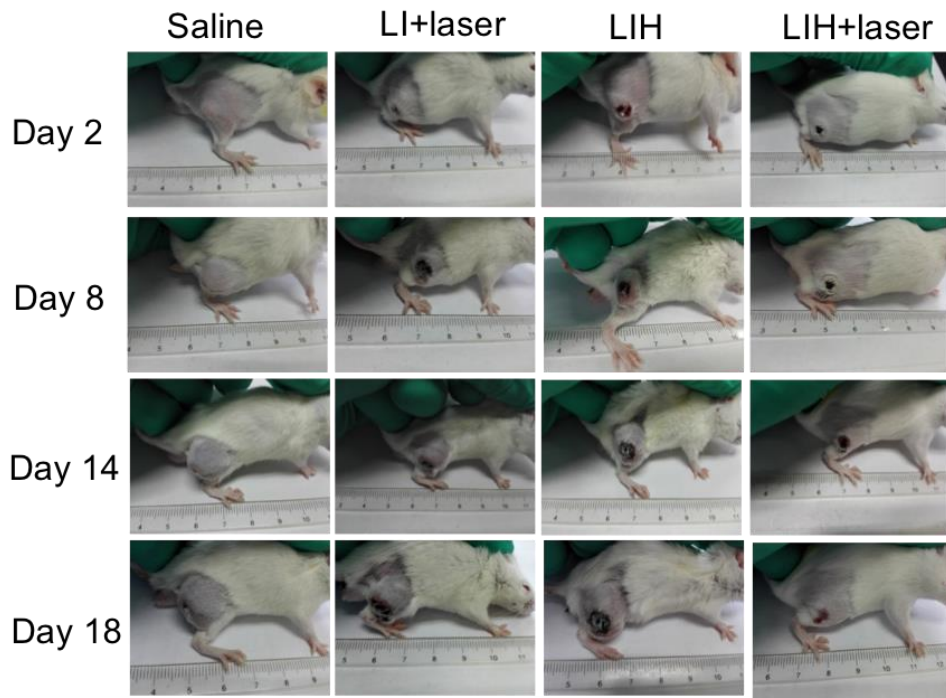

Figure S3. Representative images of mice during the enhanced PDT treatment.

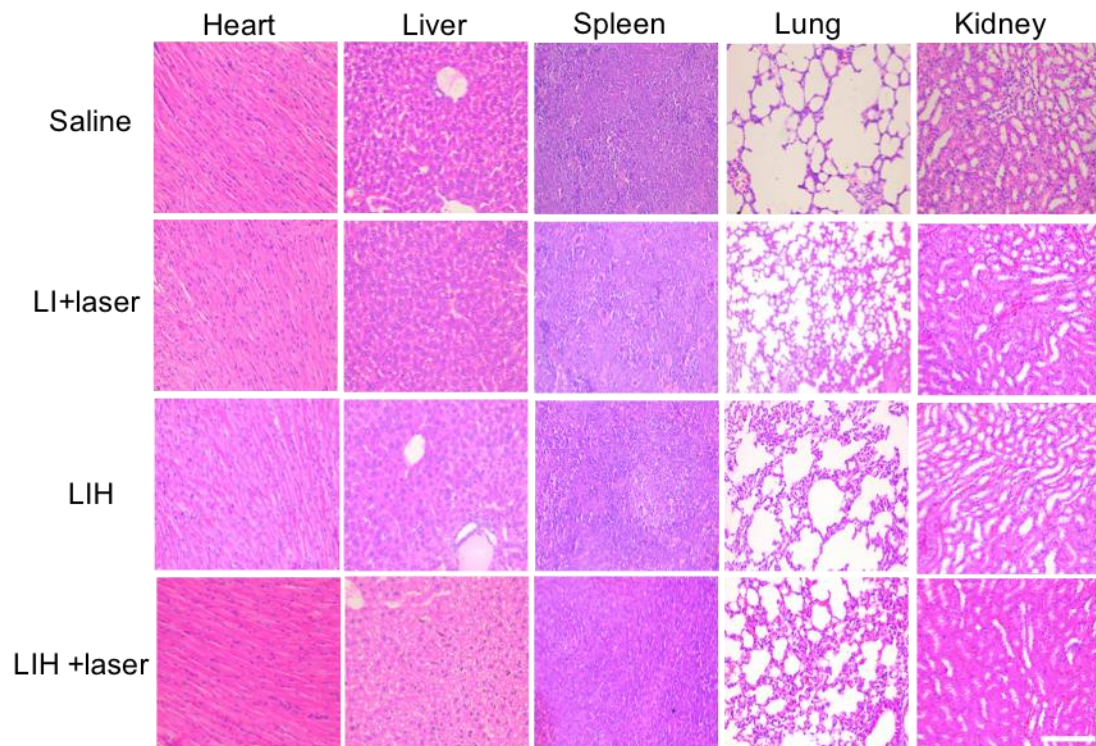

Figure S4. Systemic toxicity evaluation via hematoxylin and eosin (H&E) staining of main organs (heart, liver, spleen, lung and kidney) after experiments. Scale bars, 50  $\mu\text{m}$ .
